# Supplementary material for: Biosimilar Uptake in Medicare Advantage vs Traditional Medicare
Source: PubMed Central journal article supplement (PMC10755621; doi:10.1001/jamahealthforum.2023.4335), 2023-12-28
Supplement: jamahealthforum-e234335-s001.pdf [file jamahealthforum-e234335-s001.pdf]

## Data Sharing Statement

Kozlowski. Biosimilar Uptake in Medicare Advantage vs Traditional Medicare. *JAMA Health Forum*. Published December 28, 2023. doi:10.1001/jamahealthforum.2023.4335

### Data

**Data available:** No

### Additional Information

**Explanation for why data not available:** Individual patient data is protected information. The authors can be contacted for access to summary data.
